# Supplementary material for: Identification of key genes with differential correlations in prostate cancer
Source: publisher site journal article supplement (doi:10.18632/aging.206323), 2025-10-10
Supplement: Supplementary file [file aging-v17-206323-supplementary-material-SD1.pdf]

SUPPLEMENTARY FIGURE

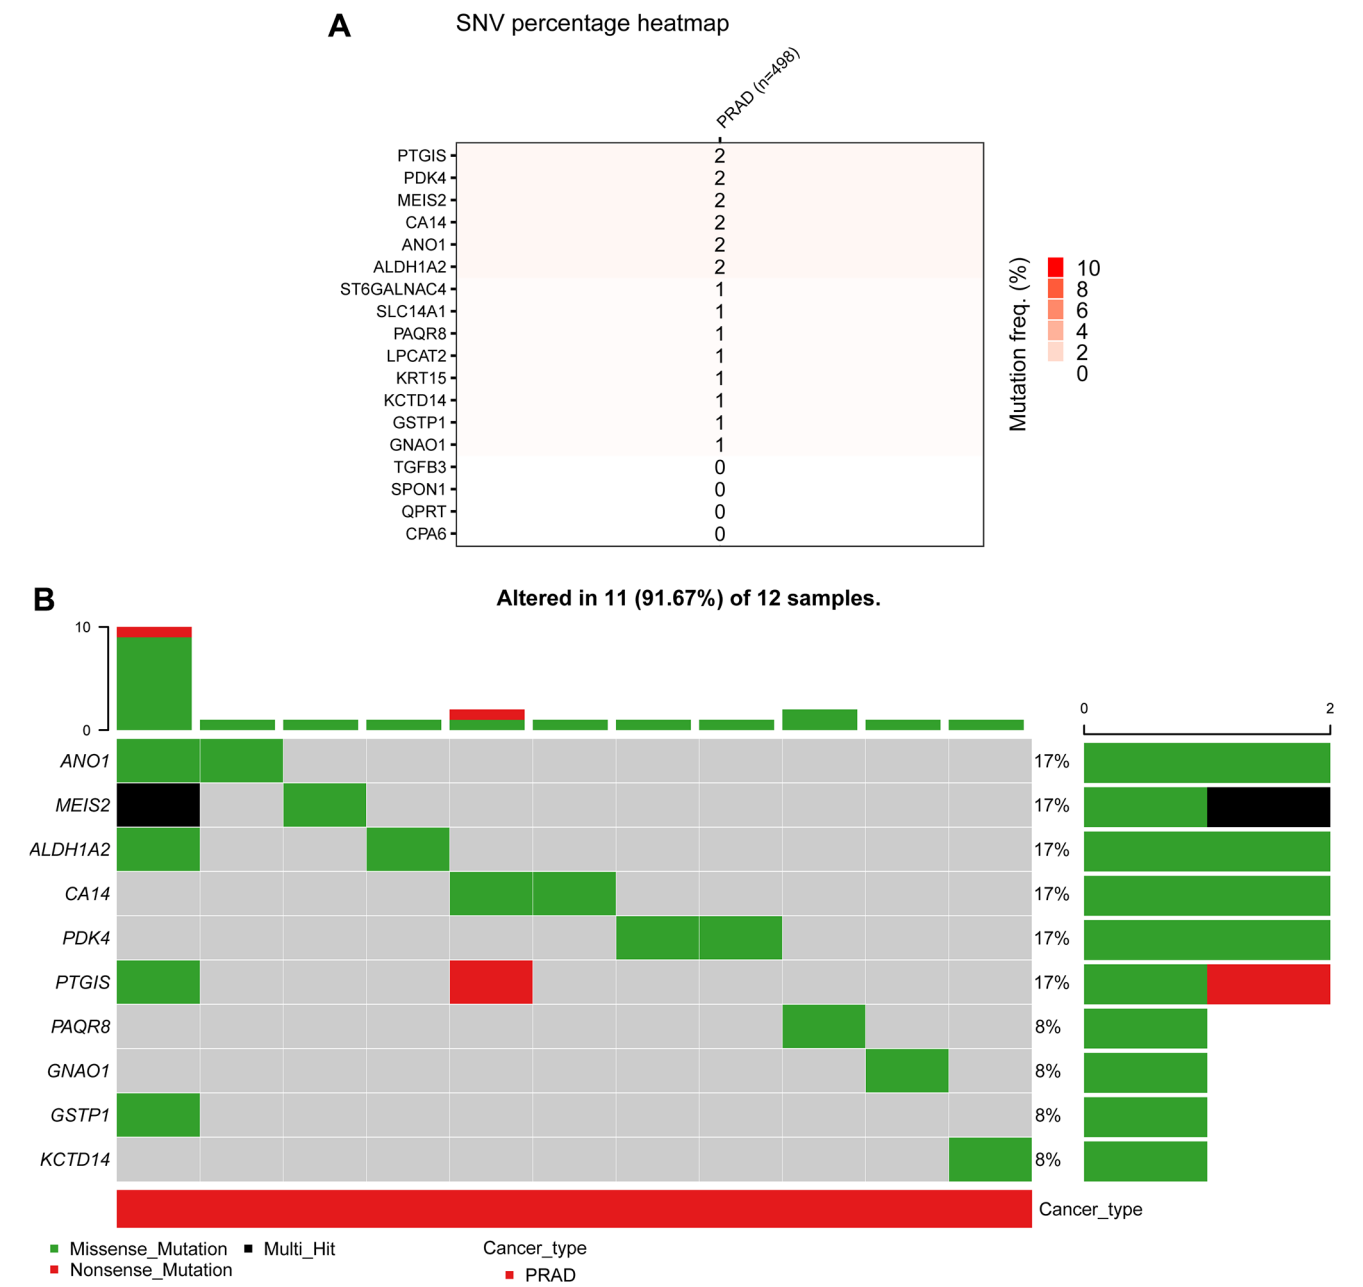

**Supplementary Figure 1. Gene mutation analysis.** (A) Figure summarizes the frequency of deleterious mutations in TCGA-PRAD. (B) Figure displayed the mutation information of indicated genes in TCGA-PRAD.
